# Supplementary material for: Functional analysis of soybean cyst nematode-inducible synthetic promoters and their regulation by biotic and abiotic stimuli in transgenic soybean (Glycine max)
Source: Front Plant Sci. 2022 Sep 9;13:988048. doi: 10.3389/fpls.2022.988048 (PMC9501883; doi:10.3389/fpls.2022.988048)
Supplement: Supplementary file 1 [file Data_Sheet_1.docx]

**Supplementary data**

**Functional analysis of soybean cyst nematode-inducible synthetic promoters and their regulation by biotic and abiotic stimuli in transgenic soybean (*Glycine max*)**

Mst Shamira Sultana1,2, Mitra Mazarei1,2, Reginald J. Millwood1, Wusheng Liu3, Tarek Hewezi1, C. Neal Stewart Jr.1,2*

1Department of Plant Sciences, University of Tennessee, Knoxville, Tennessee, USA

2Center for Agricultural Synthetic Biology, University of Tennessee, Knoxville, Tennessee, USA

3Department of Horticultural Science, North Carolina State University, Raleigh, North Carolina, USA

* Corresponding author: C. Neal Stewart Jr. Tel: 865-974-6487; Email: [nealstewart@utk.edu](mailto:nealstewart@utk.edu)

**Supplementary Table (S1):** Core motifs within the two selected synthetic promoters.

| **Promoter** | **Tetramerized motif sequences** | **Core motifs** |
| --- | --- | --- |
| 4×M1.1 | TAAAATAAAGTTCTTTAATT | TAAAA |
| TAAAGT |
| TCTTTA |
| TTAATT |
| 4×M2.3 | ATATAATTAAGT | ATATAA |
| TAATTA |
| ATTAAGT |
| AAGT |

**Supplementary Table (S2):** List of primers used in PCR and qRT-PCR.

| Gene | Forward primer | Reverse primer |
| --- | --- | --- |
| *Gus* | CGACTGGGCAGATGAACATG | GTTCAGGCACAGCACATCAA |
| *Bar* | GAAGTCCAGCTGCCAGAAAC | AAGCACGGTCAACTTCCGTA |
| *chvA* | CGAAACGCTGTTCGGCCTGTGG | GTTCAGCAGGCCGGCATCCTGG |
| *Gus* (qRT-PCR) | CTGCATCGGCGAACTGATC | GTCCTGTAGAAACCCCAACC |
| *GmUBI3* | GTGTAATGTTGGATGTGTTCCC | ACACAATTGAGTTCAACACAAACCG |


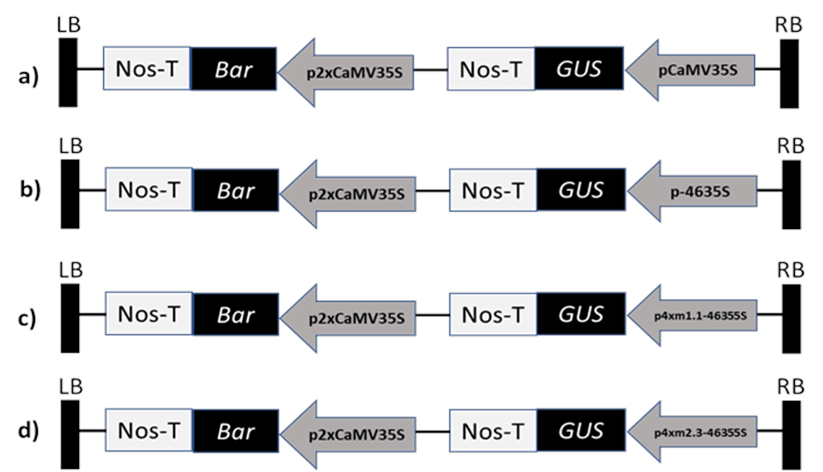


**Supplementary Figure (S1):** Schematic diagrams of promoter-GUS constructs. Left border (LB) and right border (RB) flanking the T-DNA insert are represented by black vertically elongated rectangles. 35SCaMV, 35S *Cauliflower mosaic virus* promoter; -4635S, minimal 35SCaMV promoter; 4×1.1 and 4×2.3, four repeats of the corresponding core motif; Nos-T, nopaline synthase terminator; Bar, bialaphos resistance gene; GUS, reporter gene.


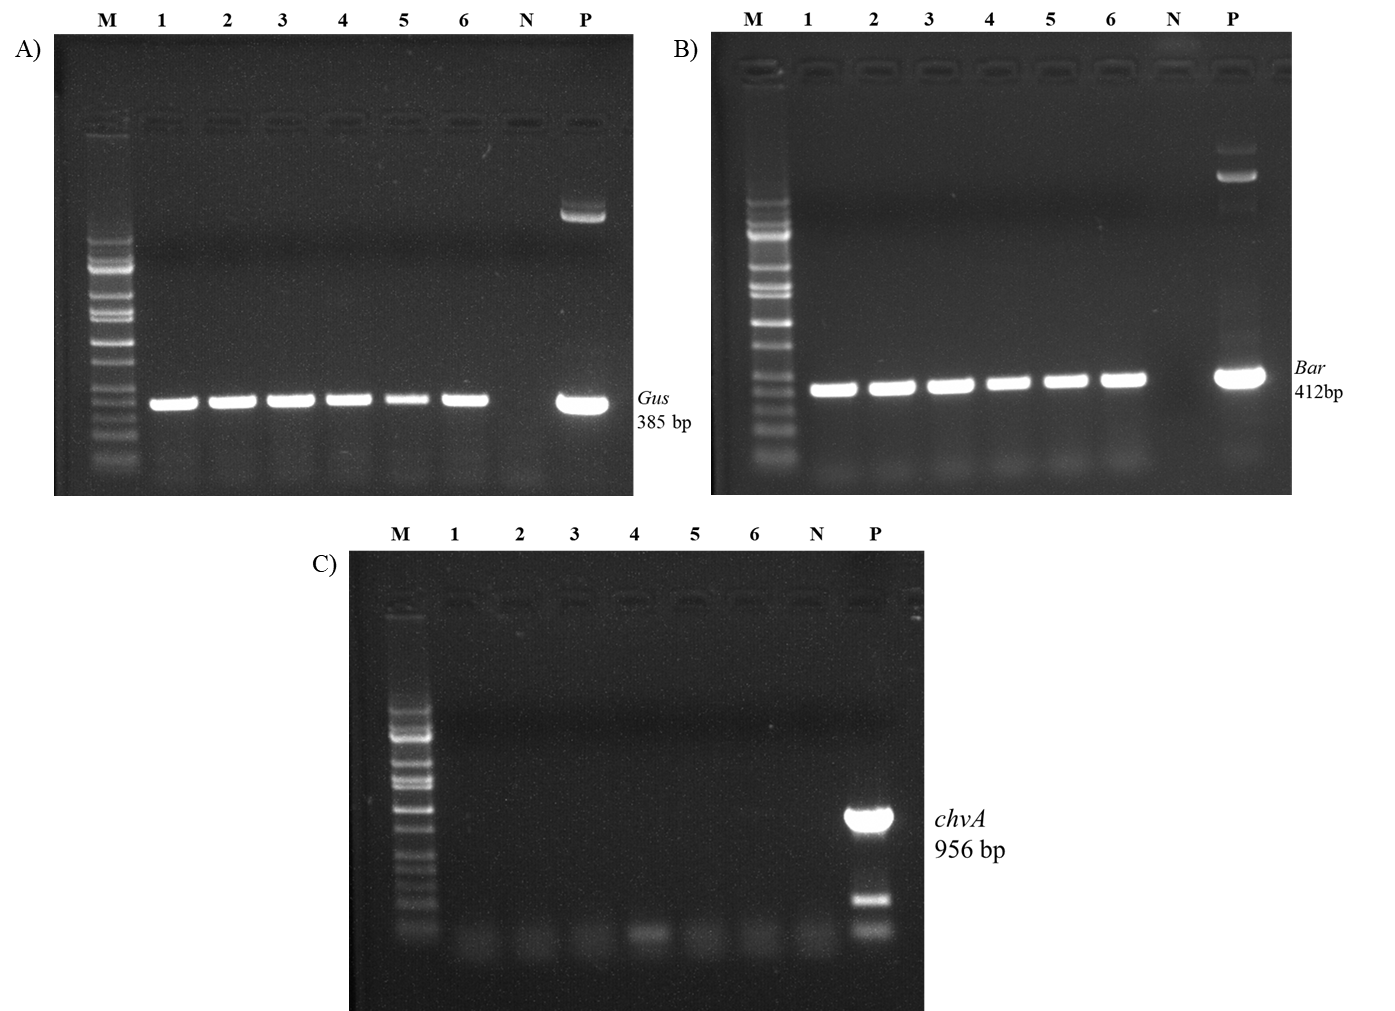


**Supplementary Figure (S2):** Molecular characterization of transgenic soybean plants containing promoter-GUS constructs. PCR analysis of genomic DNA extracted from leaves of 3-week-old plants. Lanes 1-3 are transgenic soybean lines L1, L2, and L3 containing 4×M1.1 promoter construct. Lanes 4-6 are transgenic soybean lines L1, L2, and L3 containing 4×M2.3 promoter construct. Lane N is non-transgenic wild-type soybean. Lane P is positive control template vector plasmid. The expected amplified DNA band size indicate presence of **(A)** GUS gene (385 bp) and **(B)** Bar gene (412 bp). *chvA* gene **(C)** was used as a control for the *Agrobacterium* contamination. No amplification was observed in transgenic lines **(C)**. M, DNA marker.


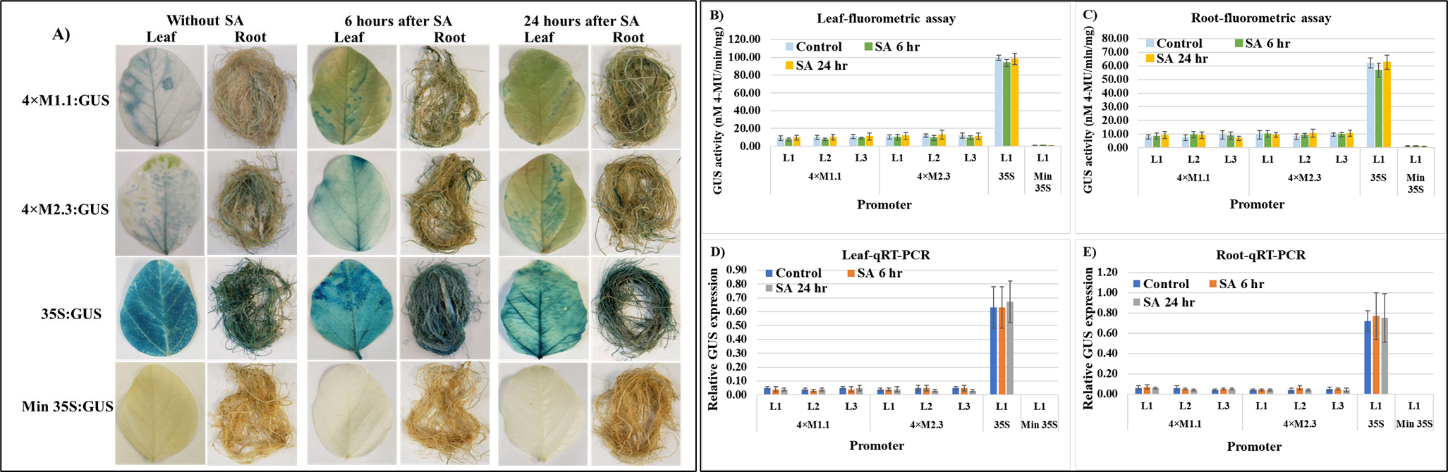


**Supplementary Figure (S3):** GUS activity in leaves and roots of 3-week-old T3 transgenic soybean containing the individual promoter-GUS construct subjected to mock (untreated control) and salicylic acid (SA) (100 µM) at two time points of 6 h and 24 h after treatment. **(A)** Histochemical staining for GUS activity in transgenic soybean plants. **(B, C)** Fluorometric assay for GUS activity in leaf **(B)** and root **(C)**. **(D, E)** Quantitative real-time RT-PCR (qRT-PCR) analysis for GUS expression in leaf **(D)** and root **(E)**. The relative levels of transcripts were normalized to soybean ubiquitin gene (*GmUBI*3). Three independent transgenic lines (L1, L2, and L3) were used for 4×M1.1 and 4×M2.3 promoter-GUS constructs. One transgenic line (L1) was used for 35S and minimal (Min) 35S promoter-GUS constructs. Bars represent mean values of six biological replicates (plants) ± standard error. Statistical analysis by a two-sample paired t-test (*P* <0.05) indicated no significant differences between treated and untreated plants.


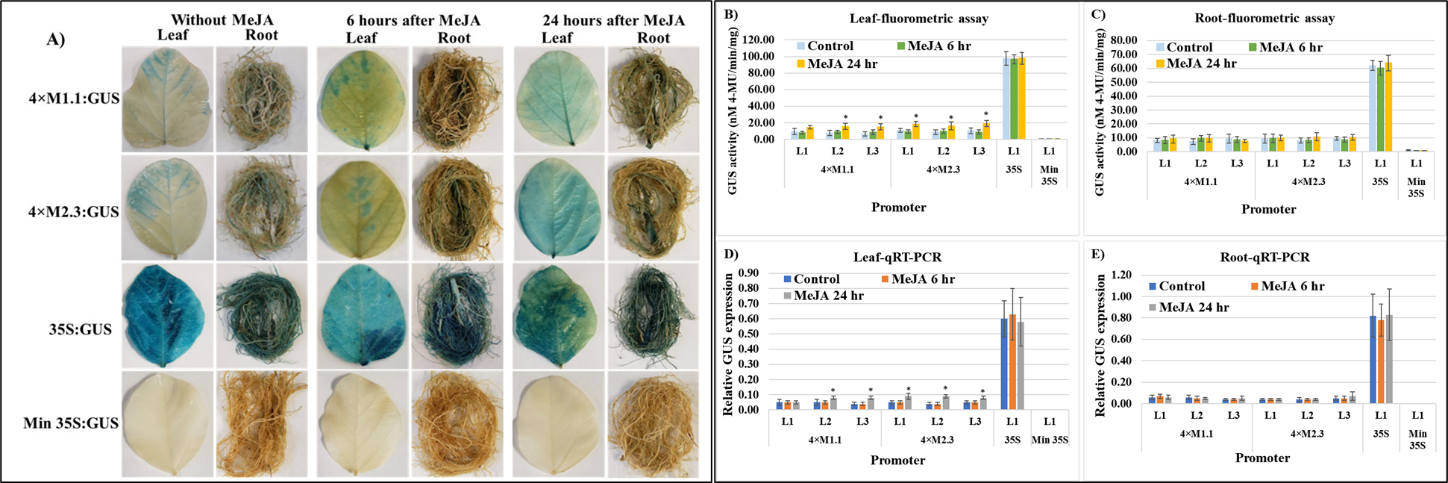


**Supplementary Figure (S4):** GUS activity in leaves and roots of 3-week-old T3 transgenic soybean containing the individual promoter-GUS construct subjected to mock (untreated control) and methyl jasmonate (MeJA) (100 µM) at two time points of 6 h and 24 h after treatment. **(A)** Histochemical staining for GUS activity in transgenic soybean plants. **(B, C)** Fluorometric assay for GUS activity in leaf **(B)** and root **(C)**. **(D, E)** Quantitative real-time RT-PCR (qRT-PCR) analysis for GUS expression in leaf **(D)** and root **(E)**. The relative levels of transcripts were normalized to soybean ubiquitin gene (*GmUBI*3). Three independent transgenic lines (L1, L2, and L3) were used for 4×M1.1 and 4×M2.3 promoter-GUS constructs. One transgenic line (L1) was used for 35S and minimal (Min) 35S promoter-GUS constructs. Bars represent mean values of six biological replicates (plants) ± standard error. Statistical significance (*p* < 0.05) was determined by two-sample paired t-test. Bars with asterisk (*) indicate significant difference compared to untreated control plants.


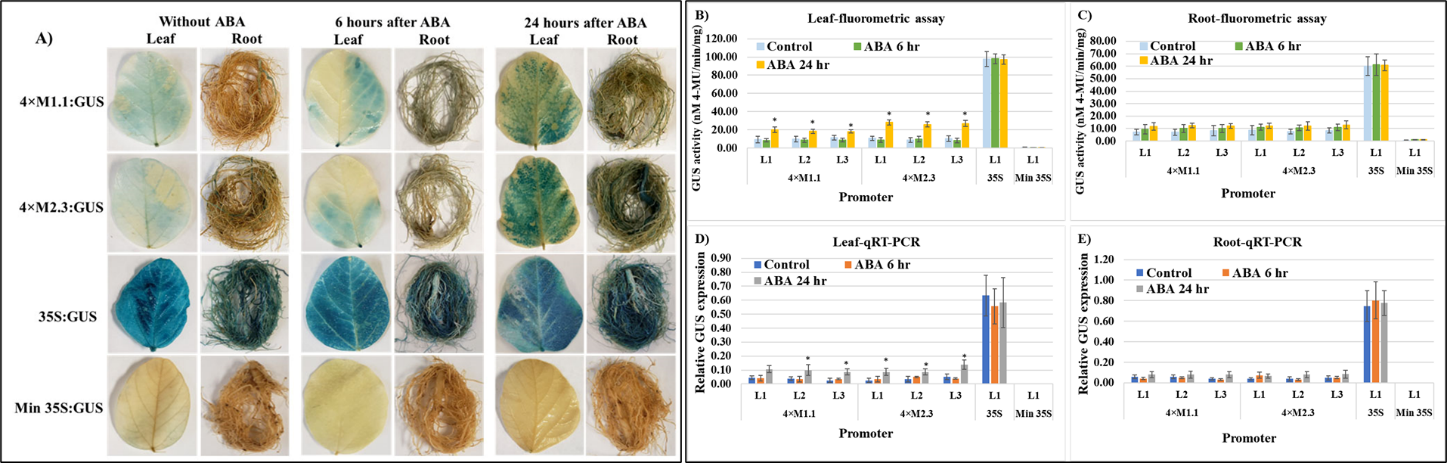


**Supplementary Figure (S5).** GUS activity in leaves and roots of 3-week-old T3 transgenic soybean containing the individual promoter-GUS construct subjected to mock (untreated control) and abscisic acid (ABA) (100 µM) at two time points of 6 h and 24 h after treatment. **(A)** Histochemical staining for GUS activity in transgenic soybean plants. **(B, C)** Fluorometric assay for GUS activity in leaf **(B)** and root **(C)**. **(D, E)** Quantitative real-time RT-PCR (qRT-PCR) analysis for GUS expression in leaf **(D)** and root **(E).** The relative levels of transcripts were normalized to soybean ubiquitin gene (*GmUBI*3). Three independent transgenic lines (L1, L2, and L3) were used for 4×M1.1 and 4×M2.3 promoter-GUS constructs. One transgenic line (L1) was used for 35S and minimal (Min) 35S promoter-GUS constructs. Bars represent mean values of six biological replicates (plants) ± standard error. Statistical significance (*p* < 0.05) was determined by two-sample paired t-test. Bars with asterisk (*) indicate significant difference compared to untreated control plants.


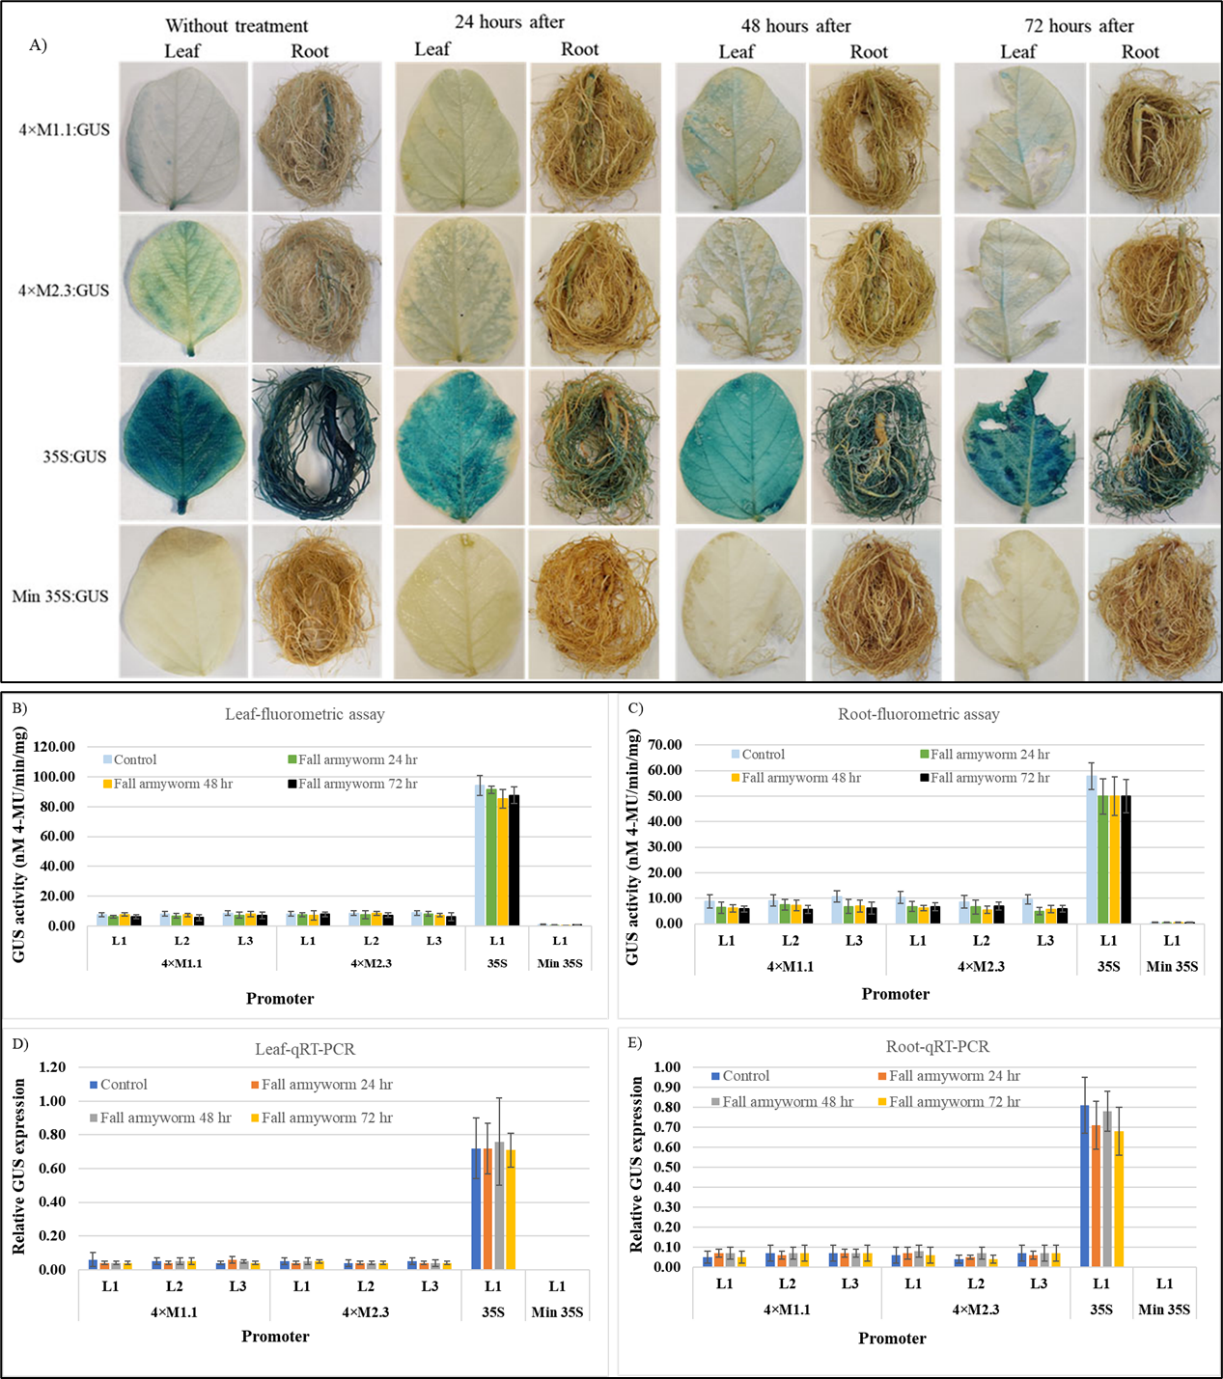


**Supplementary Figure (S6):** GUS activity in leaves and roots of transgenic soybean containing the individual promoter-GUS construct untreated or treated with fall armyworm (*Spodoptera frugiperda*) larvae at 24, 48, and 72 h after larval infestation. **(A)** Histochemical staining for GUS activity in transgenic soybean plants. **(B, C)** Fluorometric assay for GUS activity in leaf **(B)** and root **(C).** **(D, E)** Quantitative real-time RT-PCR (qRT-PCR) analysis for GUS expression in leaf **(D)** and root **(E)**. The relative levels of transcripts were normalized to soybean ubiquitin gene (*GmUBI*3). Three independent transgenic lines (L1, L2, and L3) were used for 4×M1.1 and 4×M2.3 promoter-GUS constructs. One transgenic line (L1) was used for 35S and minimal (Min) 35S promoter-GUS constructs. Bars represent mean values of six biological replicates (plants) ± standard error. Statistical analysis by a two-sample paired t-test (*P* <0.05) indicated no significant differences between treated and untreated plants.


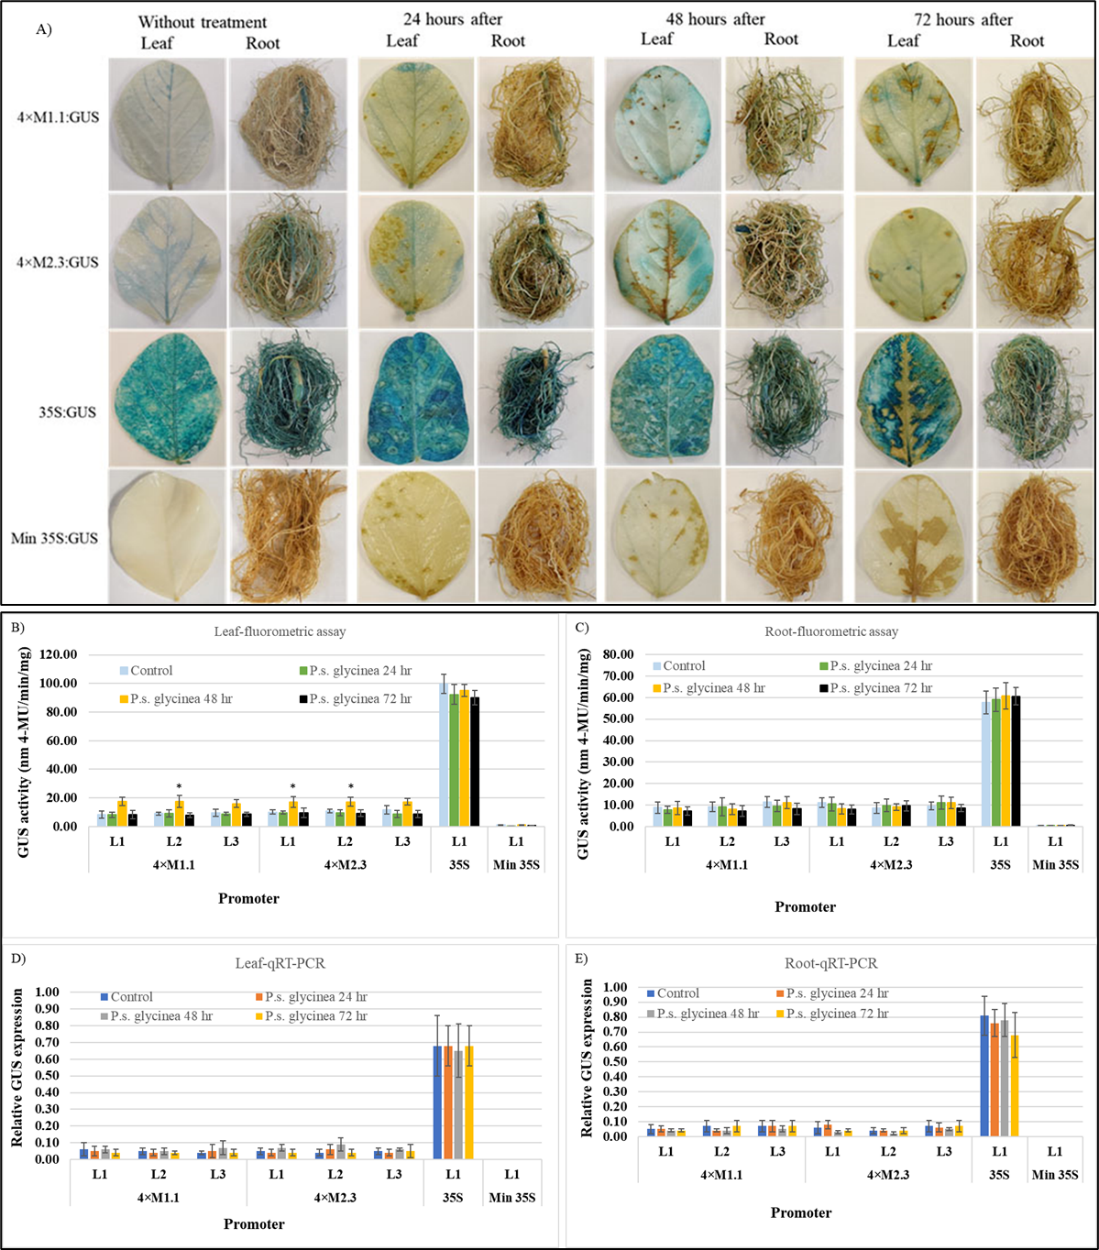


**Supplementary Figure (S7):** GUS activity in leaves and roots of transgenic soybean containing the individual promoter-GUS construct treated with 10 mM MgCl2 (mock control) or *pseudomonas syringe* pv. *glycinea* at 24, 48, and 72 h after treatment. **(A)** Histochemical staining for GUS activity in transgenic soybean plants. **(B, C)** Fluorometric assay for GUS activity in leaf **(B)** and root **(C)**. **(D, E)** Quantitative real-time RT-PCR (qRT-PCR) analysis for GUS expression in leaf **(D)** and root **(E)**. The relative levels of transcripts were normalized to soybean ubiquitin gene (*GmUBI*3). Three independent transgenic lines (L1, L2, and L3) were used for 4×M1.1 and 4×M2.3 promoter-GUS constructs. One transgenic line (L1) was used for 35S and minimal (Min) 35S promoter-GUS constructs. Bars represent mean values of six biological replicates (plants) ± standard error. Statistical significance (*p* < 0.05) was determined by two-sample paired t-test. Bars with asterisk (*) indicate significant difference compared to untreated control plants.


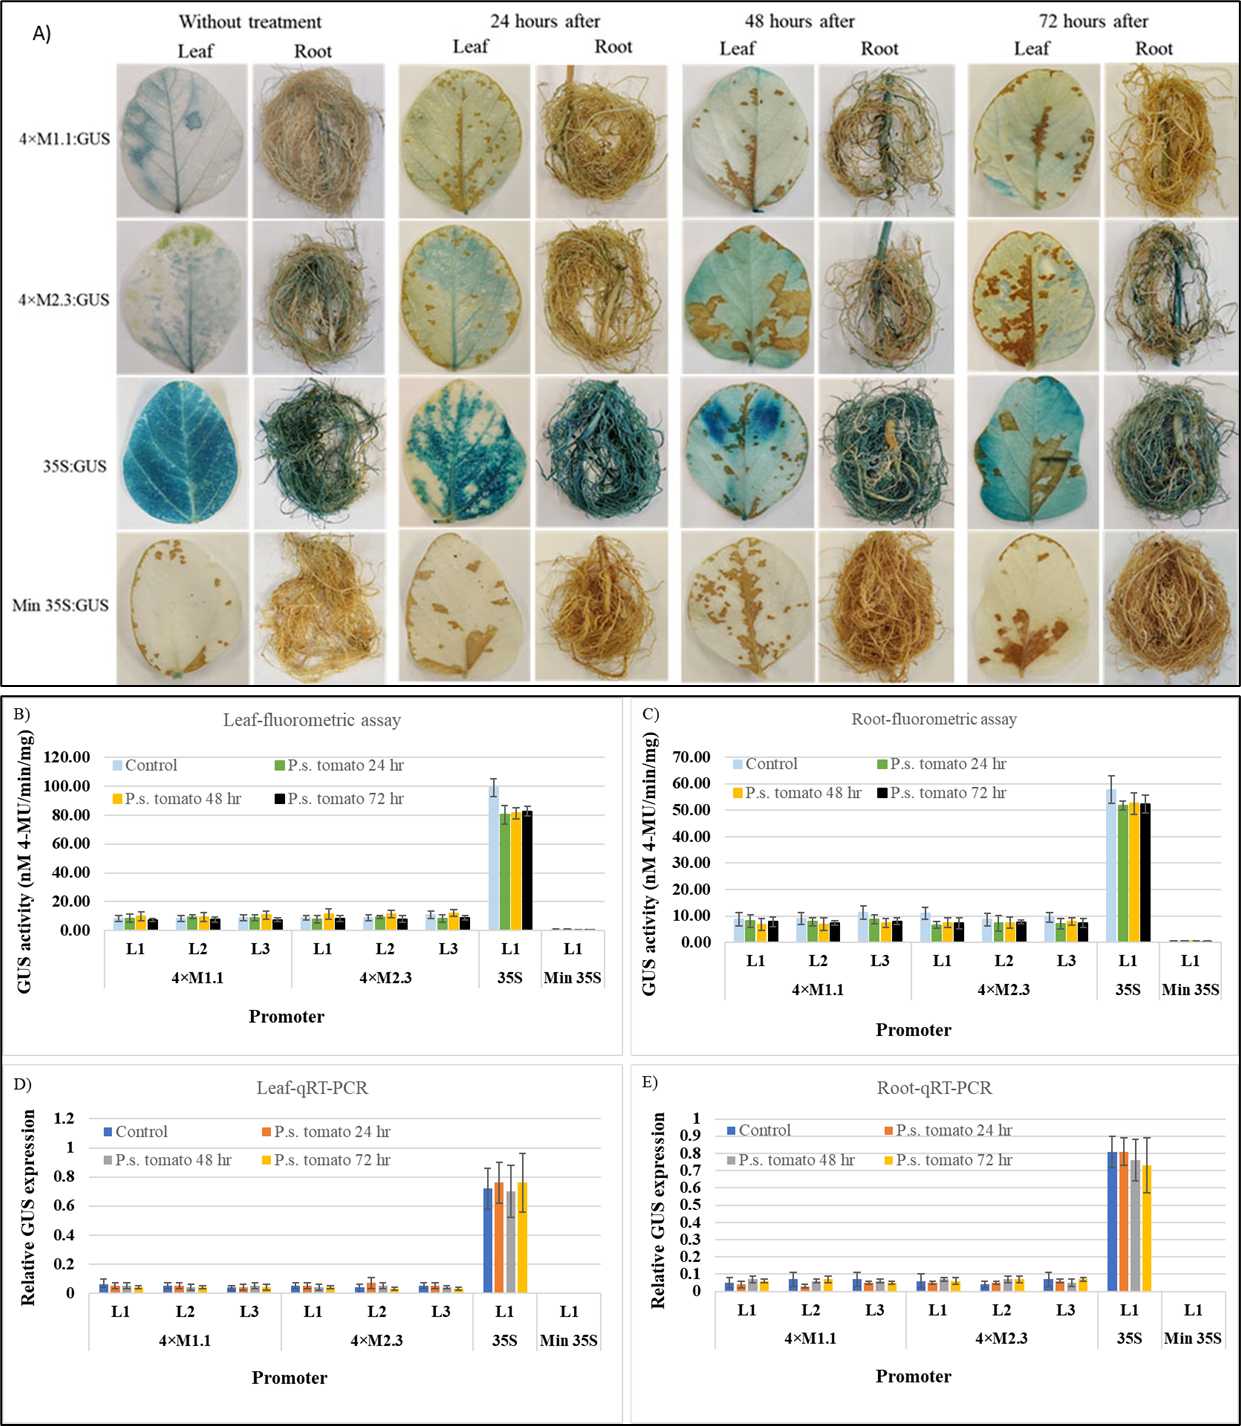


**Supplementary Figure (S8):** GUS activity in leaves and roots of transgenic soybean containing the individual promoter-GUS construct treated with 10 mM MgCl2 (mock control) or *Pseudomonas syringe* pv. *tomato* at 24, 48, and 72 h after treatment. **(A)** Histochemical staining for GUS activity in transgenic soybean plants. **(B, C)** Fluorometric assay for GUS activity in leaf **(B)** and root **(C)**. **(D, E)** Quantitative real-time RT-PCR (qRT-PCR) analysis for GUS expression in leaf **(D)** and root **(E)**. The relative levels of transcripts were normalized to soybean ubiquitin gene (*GmUBI*3). Three independent transgenic lines (L1, L2, and L3) were used for 4×M1.1 and 4×M2.3 promoter-GUS constructs. One transgenic line (L1) was used for 35S and minimal (Min) 35S promoter-GUS constructs. Bars represent mean values of six biological replicates (plants) ± standard error. Statistical analysis by a two-sample paired t-test (*P* <0.05) indicated no significant differences between treated and untreated plants.


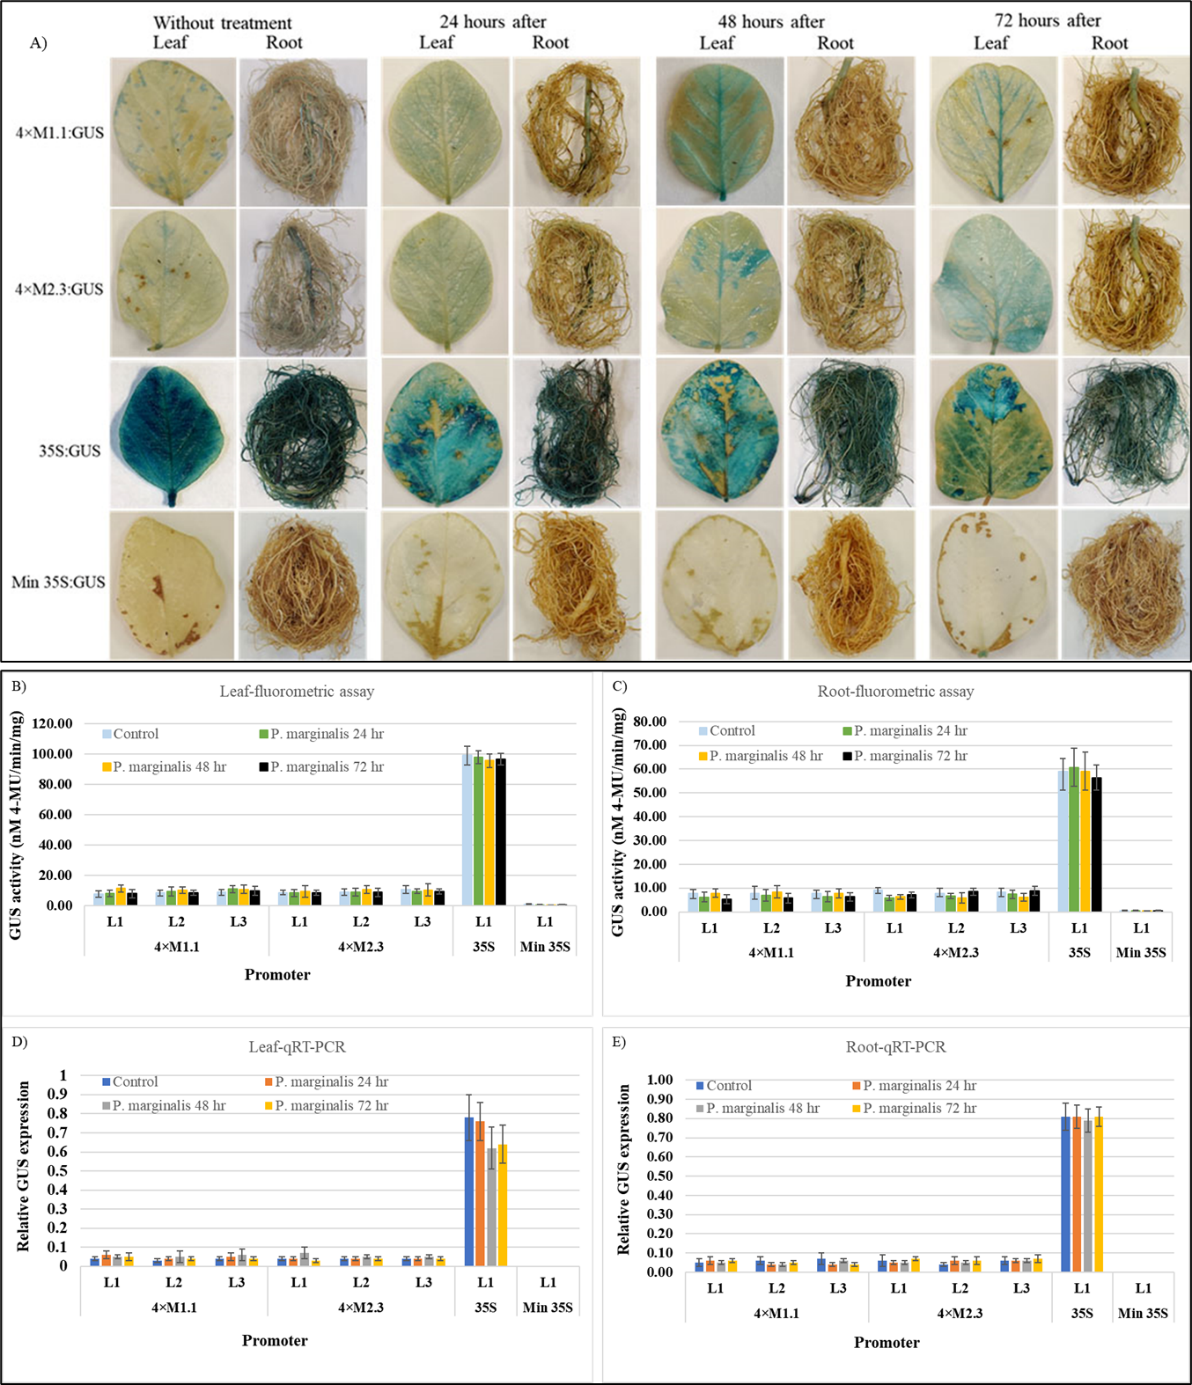


**Supplementary Figure (S9):** GUS activity in leaves and roots of transgenic soybean containing the individual promoter-GUS construct treated with 10 mM MgCl2 (mock control) or *Pseudomonas marginalis* at 24, 48, and 72 h after treatment. **(A)** Histochemical staining for GUS activity in transgenic soybean plants. **(B, C)** Fluorometric assay for GUS activity in leaf **(B)** and root **(C)**. **(D, E)** Quantitative real-time RT-PCR (qRT-PCR) analysis for GUS expression in leaf **(D)** and root **(E)**. The relative levels of transcripts were normalized to soybean ubiquitin gene (*GmUBI*3). Three independent transgenic lines (L1, L2, and L3) were used for 4×M1.1 and 4×M2.3 promoter-GUS constructs. One transgenic line (L1) was used for 35S and minimal (Min) 35S promoter-GUS constructs. Bars represent mean values of six biological replicates (plants) ± standard error. Statistical analysis by a two-sample paired t-test (*P* <0.05) indicated no significant differences between treated and untreated plants.
